# Supplementary material for: Enhanced stability of lead-free double perovskite Cs2AgInxBi1−xCl6crystals under a high humidity environment by surface capping treatment
Source: Royal Society of Chemistry journal article supplement (doi:10.1039/d2tc05420e), 2023-01-01
Supplement: d2tc05420e1.pdf [file d2tc05420e1.pdf]

## Supporting information

### **Enhanced Stability of Lead-free Double Perovskite $\text{Cs}_2\text{AgIn}_x\text{Bi}_{1-x}\text{Cl}_6$ Crystals under High Humidity Environment by Surface Capping Treatment**

Jindou Shi<sup>1</sup>, Minqiang Wang\*<sup>1</sup>, Chen Zhang<sup>1</sup>, Junnan Wang<sup>1</sup>, Yun Zhou<sup>1</sup>, Youlong Xu<sup>1</sup> and Nikolai V. Gaponenko<sup>2</sup>

<sup>1</sup>Electronic Materials Research Laboratory, Key Laboratory of the Ministry of Education International Center for Dielectric Research&Shannxi Engineering Research Center of Advanced Energy Materials and Devices, Xi'an Jiaotong University, 710049 Xi'an, China.

<sup>2</sup>Belarusian State University of Informatics and Radioelectronics, P. Browki 6, 220013 Minsk, Belarus.

Corresponding Author: E-mail: [mqwang@xjtu.edu.cn](mailto:mqwang@xjtu.edu.cn)

## ***Experimental Section***

### *1.1. Materials*

The cesium chloride (CsCl, 99.99%), silver chloride (AgCl, 99.5%), bismuth chloride (BiCl<sub>3</sub>, 99.99%), indium chloride (InCl<sub>3</sub>, 99.99%), dimethyl sulfoxide (DMSO, 99%), oleic acid (OA, 99%), isopropanol were purchased from Aladdin. The poly (vinylidene fluoride) (PVDF) purchased from Alfa Aesar. All the reagents were used without further purification.

### *1.2. Fabrication of ligand free Cs<sub>2</sub>AgIn<sub>x</sub>Bi<sub>1-x</sub>Cl<sub>6</sub> NCs with different In<sup>3+</sup> content.*

For the synthesis of ligand free Cs<sub>2</sub>AgIn<sub>x</sub>Bi<sub>1-x</sub>Cl<sub>6</sub> NCs, CsCl, AgCl, InCl<sub>3</sub> and BiCl<sub>3</sub> with molar ratio 2 : x : 1-x : 1 (x = 0, 10%, 20%, 30%, 40%, 50%, 60%, 70%, 80%, 90%, 100%) was dissolved in DMSO to form precursor solution. Typically, 0.2 mmol CsCl, 0.1 mmol AgCl and 0.1 mmol BiCl<sub>3</sub> were dissolved in 5 mL DMSO to form the precursor solution. Then 100 μL precursor solution was injected into the 5 mL isopropanol under vigorous stirring. After that, the solution was centrifuged at 2000 rpm for 5 mins to discard the large crystals.

### *1.3. Fabrication of OA ligand capped Cs<sub>2</sub>AgIn<sub>0.97</sub>Bi<sub>0.03</sub>Cl<sub>6</sub> NCs.*

For the synthesis of OA ligand capped Cs<sub>2</sub>AgIn<sub>0.97</sub>Bi<sub>0.03</sub>Cl<sub>6</sub> NCs, 0.2 mmol CsCl, 0.1 mmol AgCl, 0.01 mmol BiCl<sub>3</sub> and 0.09 mmol BiCl<sub>3</sub> were dissolved in 5 mL DMSO to form the precursor solution. Subsequently, 100 μL OA was added in 5 mL isopropanol to form the anti-solvent. Then 100 μL precursor solution was injected into the anti-solvent under vigorous stirring. After that, the solution was centrifuged at 2000 rpm for 5 mins to discard the large crystals.

### *1.4. Fabrication of PVDF capped Cs<sub>2</sub>AgIn<sub>0.97</sub>Bi<sub>0.03</sub>Cl<sub>6</sub>/PVDF CFs.*

For the synthesis of PVDF capped Cs<sub>2</sub>AgIn<sub>0.97</sub>Bi<sub>0.03</sub>Cl<sub>6</sub>/PVDF CFs, 0.2 mmol CsCl, 0.1 mmol AgCl, 0.01 mmol BiCl<sub>3</sub> and 0.09 mmol BiCl<sub>3</sub> were dissolved in 5 mL DMSO to form the precursor

solution. Subsequently, 0.5 g PVDF powder was added to the precursor solution, which was stirred at room temperature for 1 h until the PVDF powder was completely dissolved. The above colloidal solution was then applied uniformly to the substrate using a blade applicator to form a film. The substrate was gradually heated (1 °C/min) to 130 °C to promote the formation of DP  $\text{Cs}_2\text{AgIn}_{0.97}\text{Bi}_{0.03}\text{Cl}_6$ . Afterwards, the film was held at 130 °C for 30 mins until the  $\text{Cs}_2\text{AgIn}_{0.97}\text{Bi}_{0.03}\text{Cl}_6$  was completely crystallized. Finally,  $\text{Cs}_2\text{AgIn}_{0.97}\text{Bi}_{0.03}\text{Cl}_6/\text{PVDF}$  CFs was obtained by natural cooling to room temperature.

#### *1.5. LED device assembled by samples with different surface capping treatments.*

To achieve highly efficient yellow light emitting LEDs,  $\text{Cs}_2\text{AgIn}_{0.97}\text{Bi}_{0.03}\text{Cl}_6$  NCs-free,  $\text{Cs}_2\text{AgIn}_{0.97}\text{Bi}_{0.03}\text{Cl}_6$  NCs-OA and  $\text{Cs}_2\text{AgIn}_{0.97}\text{Bi}_{0.03}\text{Cl}_6/\text{PVDF}$  CFs were coated directly onto the surface of commercial UV LED chips without any encapsulation treatment, thus assembling them into yellow light emitting LED devices.

#### *Characterization Methods*

The morphology and microstructure of  $\text{Cs}_2\text{AgIn}_x\text{Bi}_{1-x}\text{Cl}_6$  NCs-free,  $\text{Cs}_2\text{AgIn}_{0.97}\text{Bi}_{0.03}\text{Cl}_6$  NCs-OA were analyzed using a high-resolution TEM (JEOL JEM-F200) and EDS detector (Oxford X-Max 65) attached to a transmission electron microscope was utilized to study the chemical compositions of the sample. The morphology and EDS spectra of  $\text{Cs}_2\text{AgIn}_{0.97}\text{Bi}_{0.03}\text{Cl}_6/\text{PVDF}$  CFs were investigated by field emission scanning electron microscopy (SEM, FEI Quatan FEG 250) equipped with an energy dispersive spectrometer (EDS). All the elemental analysis was carried out via using a PerkinElmer Optima 7300 DV inductively coupled plasma-optical emission spectrometer (ICP-OES). The photoluminescence (PL) spectra, PL quantum yields (PLQYs) and time-resolved PL (TRPL) decay curves were recorded on an Edinburgh Instruments FLS 1000

spectrometer. The ultraviolet-visible (UV-Vis) absorption and transmittance spectra were recorded by PE Lambda 950. The X-ray diffraction (XRD) patterns were obtained using the DB-ADVANCE X-ray diffraction analyzer diffractometer. The FTIR spectra was measured by Bruker's Tensor 27 Fourier transform infrared spectrometers. The EL spectra of LED were collected by a Keithley 2400 sourcemeter and a Photo Research 670 spectrometer. High temperature and high humidity chambers (BDX-30F DONGGUAN BEIDOUXING TESTING EQUIPMENT CO. LTD) were adopted to provide constant humidity for the stability testing of LED devices in high humidity environments.

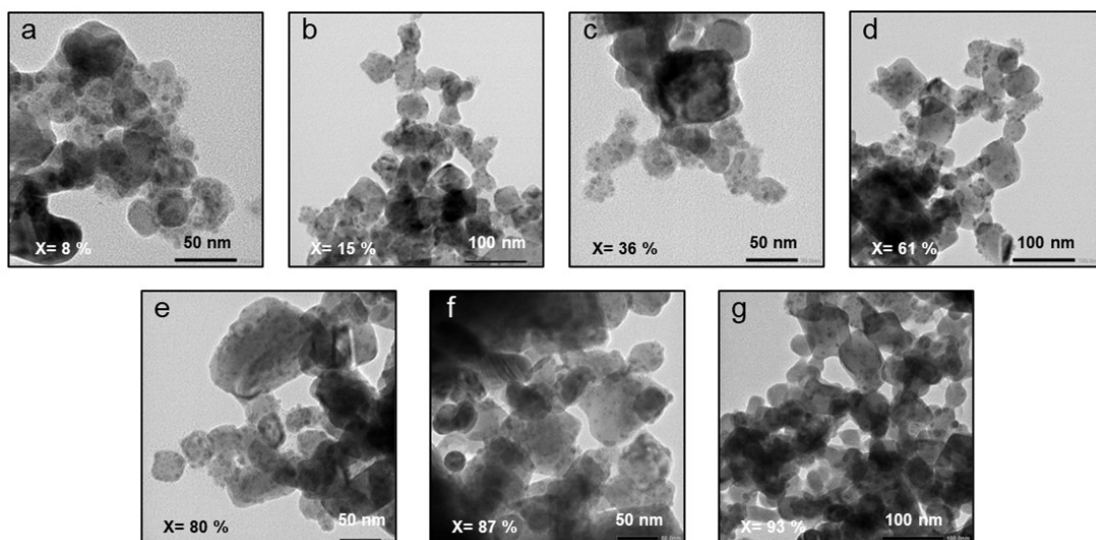

**Fig. S1** (a-g) TEM images of  $\text{Cs}_2\text{AgIn}_x\text{Bi}_{1-x}\text{Cl}_6$  NCs with different  $\text{In}^{3+}$  content ( $x = 8\%$ ,  $15\%$ ,  $36\%$ ,  $61\%$ ,  $80\%$ ,  $87\%$ ,  $93\%$ ).

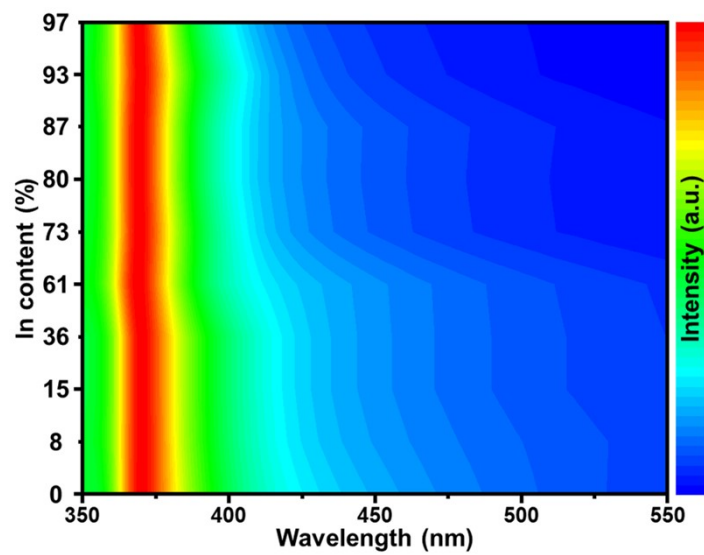

**Fig. S2** Magnified views of Cs<sub>2</sub>AgIn<sub>x</sub>Bi<sub>1-x</sub>Cl<sub>6</sub> NCs absorption tails.

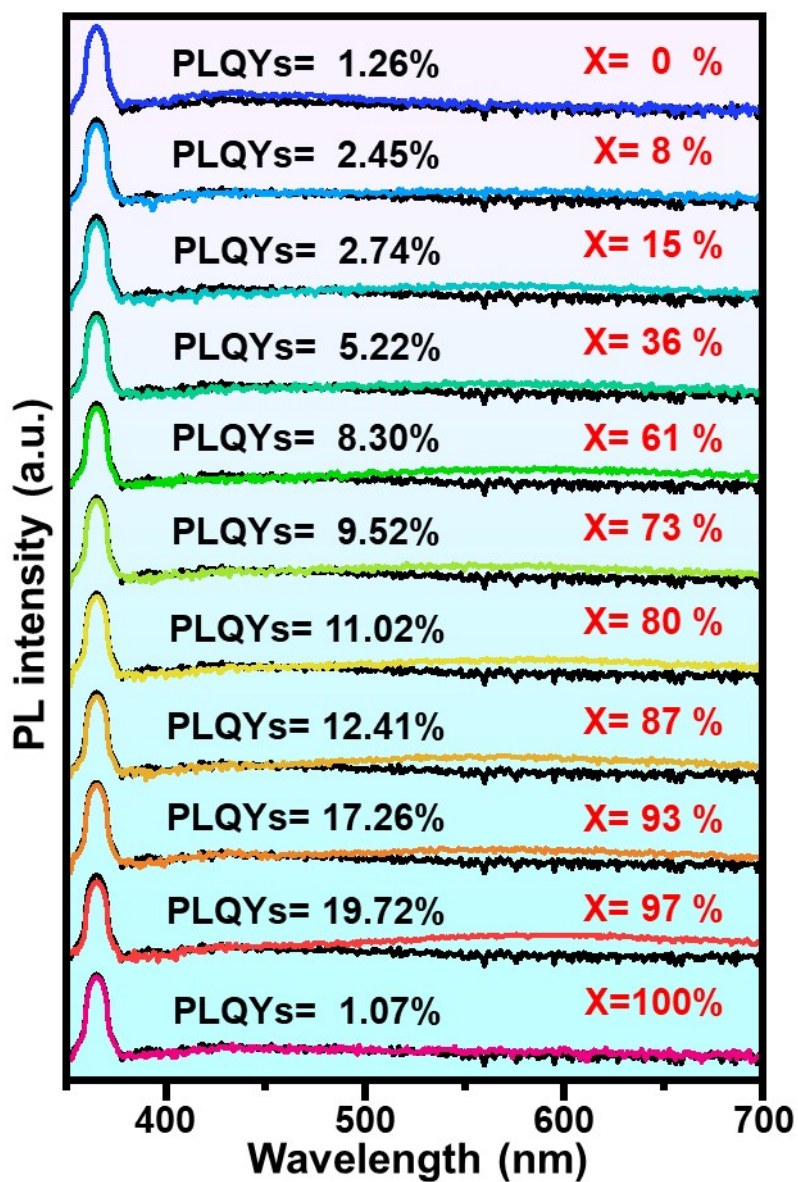

**Fig. S3** The spectra for calculating the PLQYs values of  $\text{Cs}_2\text{AgIn}_x\text{Bi}_{1-x}\text{Cl}_6$  NCs with different  $\text{In}^{3+}$  content. The black line is the spectrum of the background.

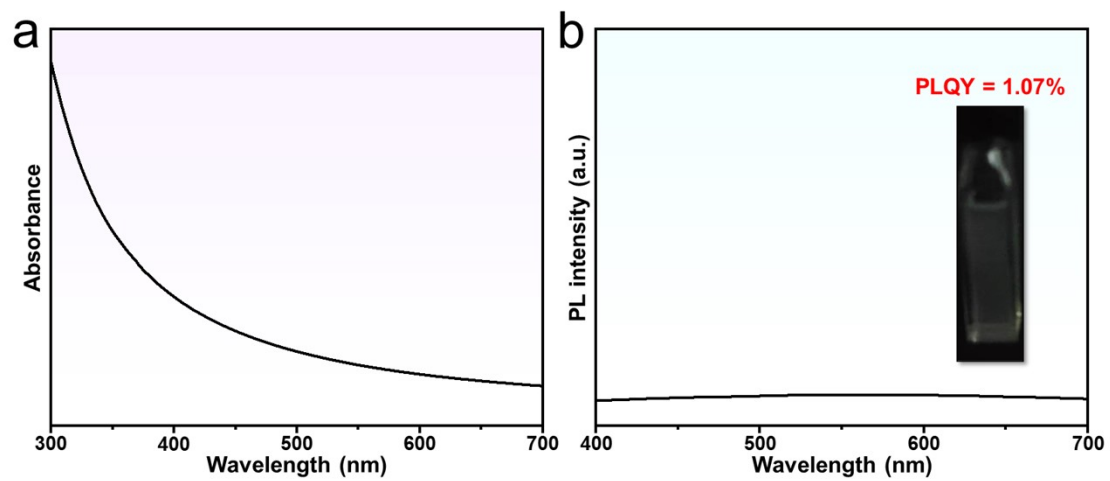

**Fig. S4** (a) Absorbance and (b) PL spectra of  $\text{Cs}_2\text{AgInCl}_6$  NCs. The inset in (b) displays the photograph and PLQY value corresponding to  $\text{Cs}_2\text{AgInCl}_6$  NCs under a 365 nm UV light.



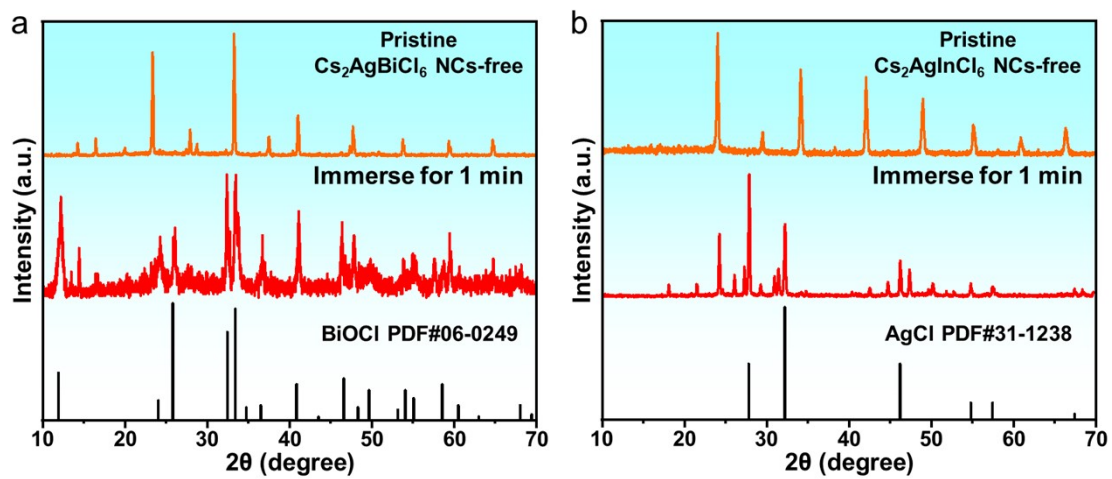

**Fig. S5** XRD patterns of (a)  $\text{Cs}_2\text{AgBiCl}_6$  NCs-free and (b)  $\text{Cs}_2\text{AgInCl}_6$  NCs-free after immersion in the mixed solution (the volume ratio of isopropanol to water is 8:2) for 1 min respectively.

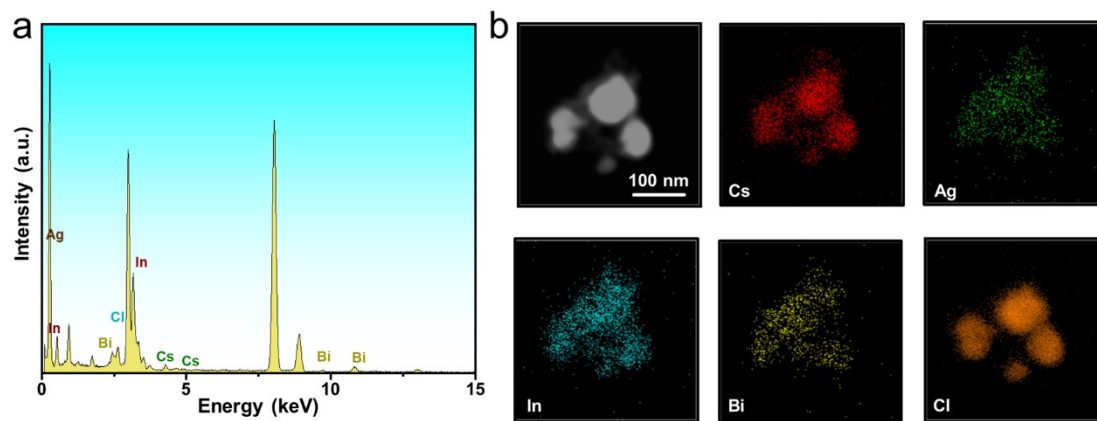

**Fig. S6** (a) EDS spectrum and (b) elemental mapping of  $\text{Cs}_2\text{AgIn}_{0.97}\text{Bi}_{0.03}\text{Cl}_6$  NCs-OA.

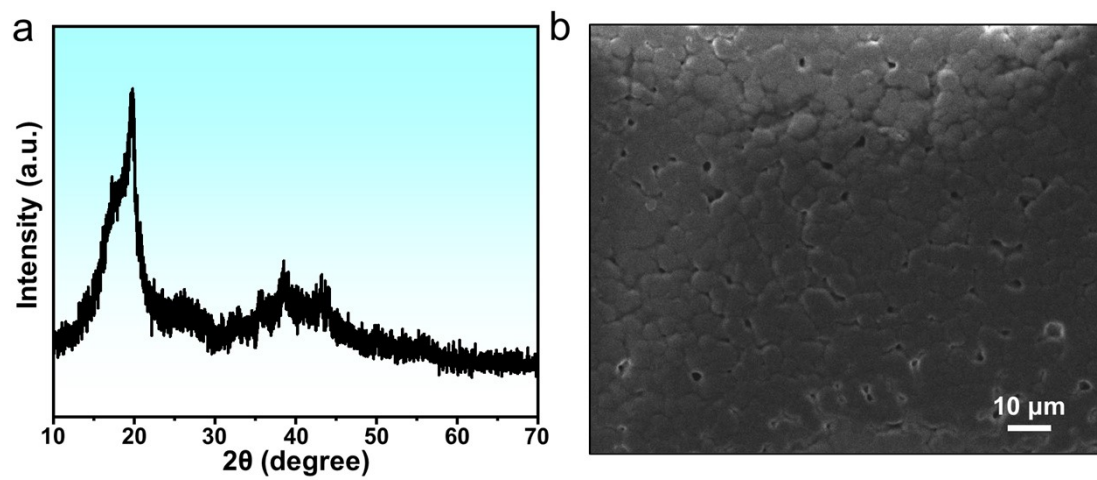

Fig. S7 (a) XRD pattern and b) SEM image of pure PVDF film.

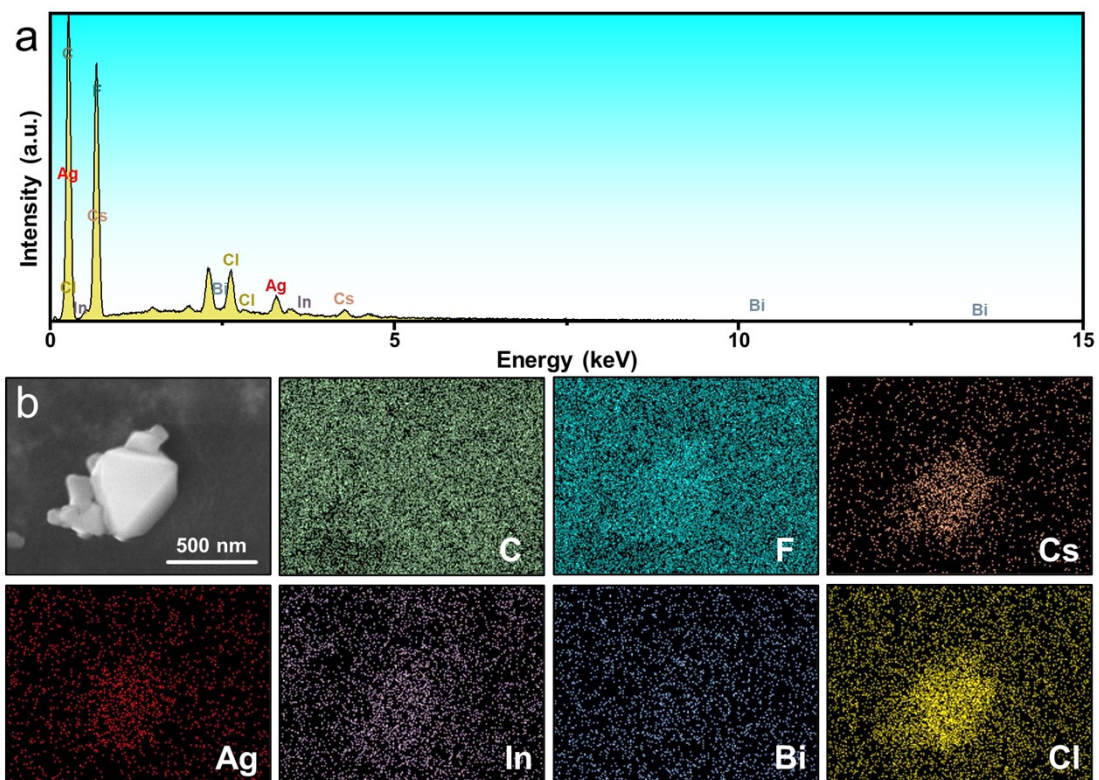

**Fig. S8** (a) EDS spectrum and (b) elemental mapping of  $\text{Cs}_2\text{AgIn}_{0.97}\text{Bi}_{0.03}\text{Cl}_6/\text{PVDF}$  CFs.

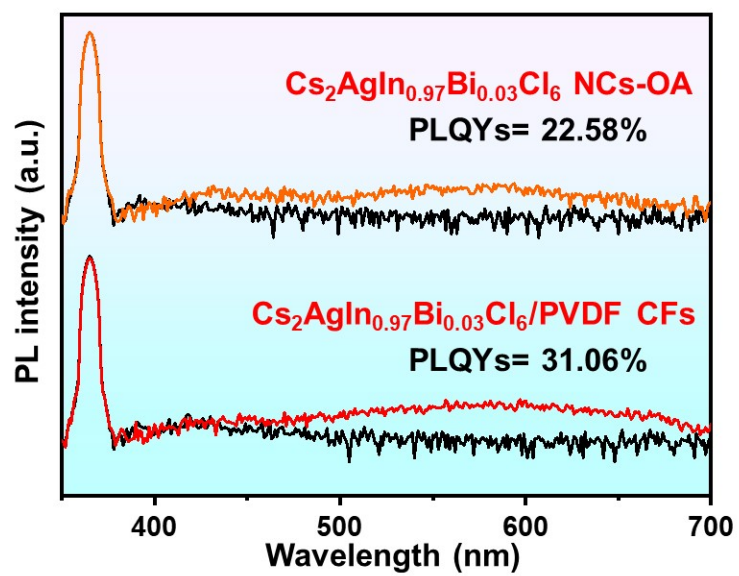

**Fig. S9** The spectra for calculating the PLQYs values of  $\text{Cs}_2\text{AgIn}_{0.97}\text{Bi}_{0.03}\text{Cl}_6$  NCs-OA and  $\text{Cs}_2\text{AgIn}_{0.97}\text{Bi}_{0.03}\text{Cl}_6$ /PVDF CFs. The black line is the spectrum of the background.

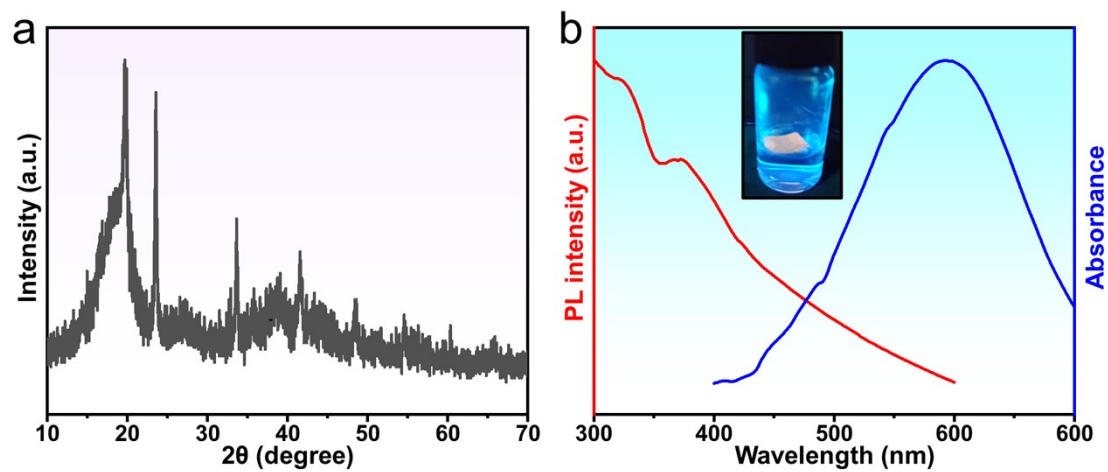

**Fig. S10** (a) XRD patterns, (b) absorbance and PL spectra of  $\text{Cs}_2\text{AgIn}_{0.97}\text{Bi}_{0.03}\text{Cl}_6/\text{PVDF}$  CFs after storage in water solution for ten days. The inset in (b) is a photograph under 365 nm UV light.

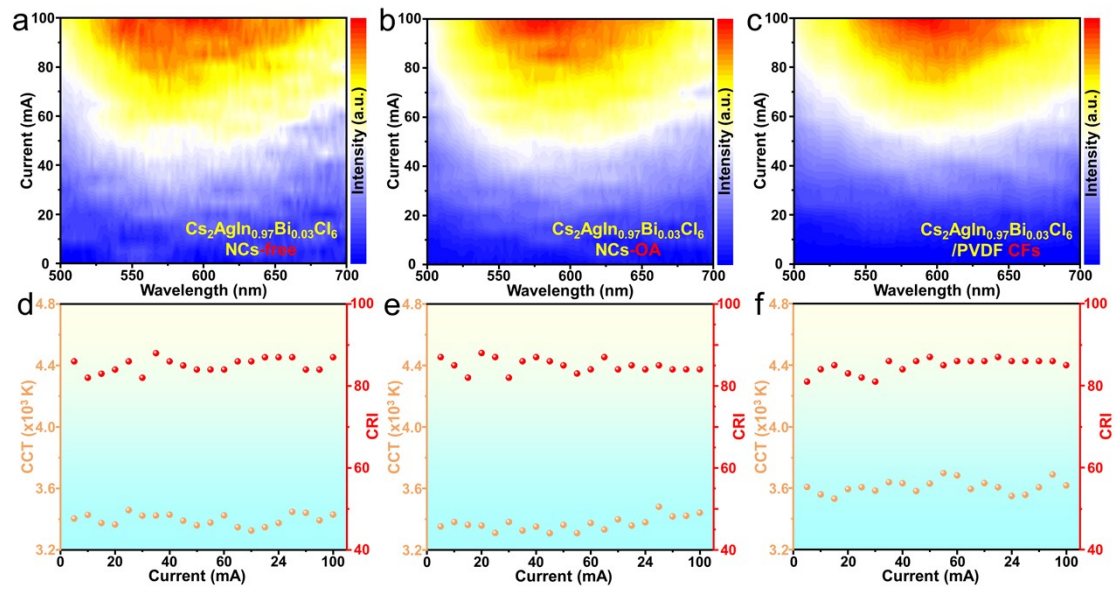

**Fig. S11** Changes in the (a-c) EL spectra, (d-f) CRI (red dot) and CCT (yellow dot) of the LEDs at different drive currents.

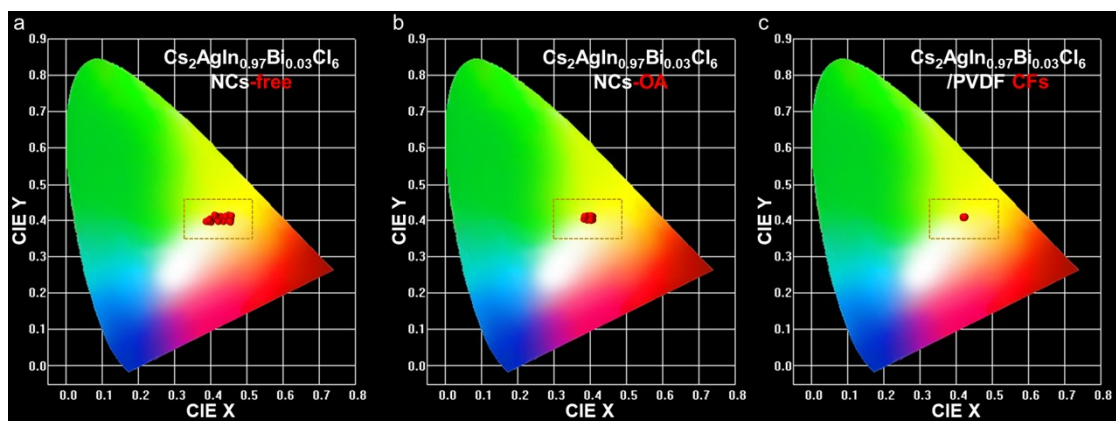

**Fig. S12** (a-c) Changes in the CIE color coordinate of the LEDs at different operating times.



**Table S1** ICP-OES results and calculations.

| In/Bi feeding ratio<br>(mol/mol) | In <sup>3+</sup><br>(g) | In <sup>3+</sup><br>(mol) | Bi <sup>3+</sup><br>(g) | Bi <sup>3+</sup><br>(mol) | In/Bi doping ratio<br>(mol/mol) |
|----------------------------------|-------------------------|---------------------------|-------------------------|---------------------------|---------------------------------|
| 0% / 100%                        | 0                       | 0                         | 0.000056                | 2.67968E-07               | 0% / 100%                       |
| 10% / 90%                        | 0.000002                | 1.74189E-08               | 0.000044                | 2.10546E-07               | 8% / 92%                        |
| 20% / 80%                        | 0.000004                | 3.48377E-08               | 0.000041                | 1.96191E-07               | 15% / 85%                       |
| 30% / 70%                        | 0.000011                | 9.58038E-08               | 0.000035                | 1.6748E-07                | 36% / 64%                       |
| 40% / 60%                        | 0.000018                | 1.5677E-07                | 0.000021                | 1.00488E-07               | 61% / 39%                       |
| 50% / 50%                        | 0.000024                | 2.09026E-07               | 0.000016                | 7.65624E-08               | 73% / 27%                       |
| 60% / 40%                        | 0.000031                | 2.69993E-07               | 0.000014                | 6.69921E-08               | 80% / 20%                       |
| 70% / 30%                        | 0.000034                | 2.96121E-07               | 0.000009                | 4.30663E-08               | 87% / 13%                       |
| 80% / 20%                        | 0.000042                | 3.65796E-07               | 0.000006                | 2.87109E-08               | 93% / 7%                        |
| 90% / 10%                        | 0.000058                | 5.05147E-07               | 0.000003                | 1.43554E-08               | 97% / 3%                        |
| 100% / 0%                        | 0.000064                | 5.57404E-07               | 0                       | 0                         | 100% / 0%                       |

**Table S2** Bi-exponential fitting results of PL decays for Cs<sub>2</sub>AgIn<sub>0.97</sub>Bi<sub>0.03</sub>Cl<sub>6</sub> NCs-free,Cs<sub>2</sub>AgIn<sub>0.97</sub>Bi<sub>0.03</sub>Cl<sub>6</sub> NCs-OA and Cs<sub>2</sub>AgIn<sub>0.97</sub>Bi<sub>0.03</sub>Cl<sub>6</sub>/PVDF CFs.

|                                                                                   | $\tau_1$ (ns) | A <sub>1</sub> (%) | $\tau_2$ (ns) | A <sub>2</sub> (%) | $\tau_{ave}$ (ns) |
|-----------------------------------------------------------------------------------|---------------|--------------------|---------------|--------------------|-------------------|
| Cs <sub>2</sub> AgIn <sub>0.97</sub> Bi <sub>0.03</sub> Cl <sub>6</sub> NCs-free  | 10.0871       | 31.24              | 62.9341       | 68.76              | 59.3469           |
| Cs <sub>2</sub> AgIn <sub>0.97</sub> Bi <sub>0.03</sub> Cl <sub>6</sub> NCs-OA    | 12.8348       | 25.91              | 74.3713       | 74.09              | 70.8688           |
| Cs <sub>2</sub> AgIn <sub>0.97</sub> Bi <sub>0.03</sub> Cl <sub>6</sub> /PVDF CFs | 17.1028       | 13.37              | 98.7725       | 86.63              | 96.6468           |

The PL decay curves of different samples were studied and the decay traces for the samples were well fitted with bi-exponential function  $Y(t)$  based on nonlinear least-squares, using the following expression.

$$Y(t) = A_1 \exp\left(-\frac{t}{\tau_1}\right) + A_2 \exp\left(-\frac{t}{\tau_2}\right) \quad (S1)$$

where  $A_1$ ,  $A_2$  are fractional contributions of time-resolved emission decay lifetimes  $\tau_1$ ,  $\tau_2$ .

The average lifetime ( $\tau_{ave}$ ) of the different samples can be obtained by the following equation.

$$\tau_{ave} = \frac{A_1 \tau_1^2 + A_2 \tau_2^2}{A_1 \tau_1 + A_2 \tau_2} \quad (S2)$$

**Table S3.** CIE coordinates, CCT, and CRI of WLEDs based on different lead-free DP.

| Device structure                                                                                                                                                                                                  | CIE coordinates  | CCT (K) | CRI  | Ref       |
|-------------------------------------------------------------------------------------------------------------------------------------------------------------------------------------------------------------------|------------------|---------|------|-----------|
| UV LED/Cs <sub>2</sub> AgIn <sub>0.7</sub> Bi <sub>0.3</sub> Cl <sub>6</sub> /PMMA                                                                                                                                | (0.36, 0.35)     | 4443    | ≈91  | 1         |
| UV LED/Cs <sub>2</sub> (Na, Ag)InCl <sub>6</sub> :7.09%Ho <sup>3+</sup>                                                                                                                                           | (0.40, 0.47)     | -       | 75.4 | 2         |
| UV LED/Cs <sub>2</sub> Na <sub>0.4</sub> Ag <sub>0.6</sub> In <sub>0.995</sub> Bi <sub>0.005</sub> Cl <sub>6</sub> :Mn <sup>2+</sup>                                                                              | (0.38, 0.42)     | 4323.4  | 82.6 | 3         |
| UV LED/Cs <sub>2</sub> Ag <sub>0.6</sub> Na <sub>0.4</sub> InCl <sub>6</sub> :Bi <sup>3+</sup>                                                                                                                    | (0.396, 0.448)   | 4054    | -    | 4         |
| UV LED/Cs <sub>2</sub> AgIn <sub>0.833</sub> Bi <sub>0.167</sub> Cl <sub>6</sub>                                                                                                                                  | (0.448, 0.444)   | 3119    | 85   | 5         |
| UV LED/Cs <sub>2</sub> Ag <sub>0.4</sub> Na <sub>0.6</sub> InCl <sub>6</sub> :1%Bi <sup>3+</sup> -1% Ce <sup>3+</sup>                                                                                             | (0.47, 0.45)     | 2769    | 84.1 | 6         |
| UV LED/Cs <sub>2</sub> NaInCl <sub>6</sub> :2.5%Sb,45%Tb,3%Mn                                                                                                                                                     | (0.41, 0.39)     | 3371    | 89.2 | 7         |
| UV LED/Cs <sub>2</sub> NaInCl <sub>6</sub> :Sb <sup>3+</sup> /Cs <sub>2</sub> NaInCl <sub>6</sub> :Rb <sup>+</sup> ,Sb <sup>3+</sup> /<br>Cs <sub>2</sub> NaInCl <sub>6</sub> :Mn <sup>2+</sup> ,Sb <sup>3+</sup> | (0.30, 0.35)     | 6772    | 91   | 8         |
| UV<br>LED/Cs <sub>2</sub> AgIn <sub>0.9</sub> Cr <sub>0.1</sub> Cl <sub>6</sub> /SrSi <sub>2</sub> O <sub>2</sub> N <sub>2</sub> :Eu <sup>2+</sup> /CaAlSiN <sub>3</sub> :Eu <sup>2+</sup>                        | (0.3819, 0.4196) | 4200    | -    | 9         |
| UV LED/Cs <sub>2</sub> NaInCl <sub>6</sub> :Sb <sup>3+</sup> /Sr <sub>2</sub> Si <sub>5</sub> N <sub>8</sub> :Eu <sup>2+</sup> /β-<br>SiAlON:Eu <sup>2+</sup>                                                     | (0.3890, 0.4009) | 3972.6  | 90.6 | 10        |
| UV LED/Cs <sub>2</sub> Na <sub>0.8</sub> Ag <sub>0.2</sub> BiCl <sub>6</sub> /PMMA                                                                                                                                | (0.48, 0.44)     | 2600    | 85   | 11        |
| UV LED/Cs <sub>2</sub> AgIn <sub>0.97</sub> Bi <sub>0.03</sub> Cl <sub>6</sub> -free                                                                                                                              | (0.39, 0.40)     | 3400    | 85   | this work |
| UV LED/Cs <sub>2</sub> AgIn <sub>0.97</sub> Bi <sub>0.03</sub> Cl <sub>6</sub> -OA                                                                                                                                | (0.39, 0.40)     | 3400    | 85   | this work |
| UV LED/Cs <sub>2</sub> AgIn <sub>0.97</sub> Bi <sub>0.03</sub> Cl <sub>6</sub> /PVDF                                                                                                                              | (0.41, 0.40)     | 3600    | 85   | this work |

**Notes and references**

- 1 D. Manna, T. K. Das and A. Yella, *Chem Mater*, 2019, **31**, 10063-10070.
- 2 S. R. Li, Q. S. Hu, J. J. Luo, T. Jin, J. Liu, J. H. Li, Z. F. Tan, Y. B. Han, Z. Zheng, T. Y. Zhai, H. S. Song, L. Gao, G. D. Niu and J. Tang, *Adv Opt Mater*, 2019, **7**, 1901098.
- 3 M. C. Hu, J. J. Luo, S. R. Li, J. Liu, J. H. Li, Z. F. Tan, G. D. Niu, Z. X. Wang and J. Tang, *Opt Lett*, 2019, **44**, 4757-4760.
- 4 J. J. Luo, X. M. Wang, S. R. Li, J. Liu, Y. M. Guo, G. D. Niu, L. Yao, Y. H. Fu, L. Gao, Q. S. Dong, C. Y. Zhao, M. Y. Leng, F. S. Ma, W. X. Liang, L. D. Wang, S. Y. Jin, J. B. Han, L. J. Zhang, J. Etheridge, J. B. Wang, Y. F. Yan, E. H. Sargent and J. Tang, *Nature*, 2018, **563**, 541-545.

- 5 M. B. Gray, J. D. Majher, T. A. Strom and P. M. Woodward, *Inorg Chem*, 2019, **58**, 13403-13410.
- 6 C. Y. Wang, P. Liang, R. J. Xie, Y. Yao, P. Liu, Y. T. Yang, J. Hu, L. Y. Shao, X. W. Sun, F. Y. Kang and G. D. Wei, *Chem Mater*, 2020, **32**, 7814-7821.
- 7 H. W. Li, L. Tian, Z. Shi, Y. Li, C. Y. Li, J. Feng and H. J. Zhang, *J Mater Chem C*, 2022, **10**, 10609-10615.
- 8 W. Zhuang, H. Liu, Y. Chen, W. Xu, H. Gao, Y. Tian, D. Yao and H. Zhang, *Ceram Int*, 2023, DOI: 10.1016/j.ceramint.2023.01.170.
- 9 F. Y. Zhao, Z. Song, J. Zhao and Q. L. Liu, *Inorg Chem Front*, 2019, **6**, 3621-3628.
- 10 M. B. Gray, S. Hariyani, T. A. Strom, J. D. Majher, J. Brgoch and P. M. Woodward, *J Mater Chem C*, 2020, **8**, 6797-6803.
- 11 J. Shi, M. Wang, C. Zhang, J. Wang, Y. Zhou, Y. Xu, N. V. Gaponenko and A. S. Bhatti, *ACS Appl Mater Inter*, 2023, DOI: 10.1021/acsami.2c22752.
